# Exogenous Hydrogen Sulfide (H<sub>2</sub>S) Protects Alveolar Growth in Experimental O<sub>2</sub>-Induced Neonatal Lung Injury

Arul Vadivel<sup>1</sup>, Rajesh S. Alphonse<sup>2</sup>, Lavinia Ionescu<sup>2</sup>, Desiree S. Machado<sup>2</sup>, Megan O'Reilly<sup>2</sup>, Farah Eaton<sup>2</sup>, Al Haromy<sup>2</sup>, Evangelos D. Michelakis<sup>2</sup>, Bernard Thébaud<sup>1\*</sup>

**1** Ottawa Hospital Research Institute, Sprott Center for Stem Cell Research, Regenerative Medicine Program and Children's Hospital of Eastern Ontario, University of Ottawa, Ottawa, Ontario, Canada, **2** Department of Pediatrics, School of Human Development, Women and Children's Health Research Institute, Cardiovascular Research Center and Pulmonary Research Group, University of Alberta, Edmonton, Canada

## Abstract

**Background:** Bronchopulmonary dysplasia (BPD), the chronic lung disease of prematurity, remains a major health problem. BPD is characterized by impaired alveolar development and complicated by pulmonary hypertension (PHT). Currently there is no specific treatment for BPD. Hydrogen sulfide (H<sub>2</sub>S), carbon monoxide and nitric oxide (NO), belong to a class of endogenously synthesized gaseous molecules referred to as gasotransmitters. While inhaled NO is already used for the treatment of neonatal PHT and currently tested for the prevention of BPD, H<sub>2</sub>S has until recently been regarded exclusively as a toxic gas. Recent evidence suggests that endogenous H<sub>2</sub>S exerts beneficial biological effects, including cytoprotection and vasodilatation. We hypothesized that H<sub>2</sub>S preserves normal alveolar development and prevents PHT in experimental BPD.

**Methods:** We took advantage of a recently described slow-releasing H<sub>2</sub>S donor, GYY4137 (morpholin-4-ium-4-methoxyphenyl(morpholino) phosphinodithioate) to study its lung protective potential *in vitro* and *in vivo*.

**Results:** *In vitro*, GYY4137 promoted capillary-like network formation, viability and reduced reactive oxygen species in hyperoxia-exposed human pulmonary artery endothelial cells. GYY4137 also protected mitochondrial function in alveolar epithelial cells. *In vivo*, GYY4137 preserved and restored normal alveolar growth in rat pups exposed from birth for 2 weeks to hyperoxia. GYY4137 also attenuated PHT as determined by improved pulmonary arterial acceleration time on echo-Doppler, pulmonary artery remodeling and right ventricular hypertrophy. GYY4137 also prevented pulmonary artery smooth muscle cell proliferation.

**Conclusions:** H<sub>2</sub>S protects from impaired alveolar growth and PHT in experimental O<sub>2</sub>-induced lung injury. H<sub>2</sub>S warrants further investigation as a new therapeutic target for alveolar damage and PHT.

**Citation:** Vadivel A, Alphonse RS, Ionescu L, Machado DS, O'Reilly M, et al. (2014) Exogenous Hydrogen Sulfide (H<sub>2</sub>S) Protects Alveolar Growth in Experimental O<sub>2</sub>-Induced Neonatal Lung Injury. PLoS ONE 9(3): e90965. doi:10.1371/journal.pone.0090965

**Editor:** Rory Edward Morty, University of Giessen Lung Center, Germany

**Received:** October 10, 2013; **Accepted:** February 5, 2014; **Published:** March 6, 2014

**Copyright:** © 2014 Vadivel et al. This is an open-access article distributed under the terms of the Creative Commons Attribution License, which permits unrestricted use, distribution, and reproduction in any medium, provided the original author and source are credited.

**Funding:** This work was supported by the Canadian Institutes of Health Research (CIHR). AV and LI were supported by a stipend from the Maternal Fetal Neonatal Health Training Program (MFN) sponsored by CIHR-IHDCYH. RAS was supported by a stipend from Alberta Innovates Health Solutions (AIHS). BT and EDM were supported by CIHR, AIHS, Canada Foundation for Innovation (CFI), and the Canada Research Chairs Program. BT was also supported by the Stollery Children's Hospital Foundation. The funders had no role in study design, data collection and analysis, decision to publish, or preparation of the manuscript.

**Competing Interests:** The authors have declared that no competing interests exist.

\* E-mail: bthebaud@ohri.ca

## Introduction

Preterm birth, respiratory distress syndrome (RDS), and bronchopulmonary dysplasia (BPD), the chronic lung disease of prematurity, continue to be important causes of morbidity and mortality in the neonatal intensive care unit [1]. Despite improvements in perinatal care, the incidence of BPD remains unchanged [2]. Preterm birth before 28 weeks of gestation interrupts the normal sequence of lung growth leading to impaired alveolar and lung vascular development [3]. Emerging evidence suggests that BPD may have long-term respiratory complications that reach beyond childhood. Follow-up studies indicate that children and young adults who were born very preterm are at an

increased risk of respiratory symptoms, poor lung function, lower exercise capacity [4] and pulmonary hypertension (PHT) [5,6]. Currently, there is no effective treatment for BPD.

Hydrogen sulfide (H<sub>2</sub>S) has long been considered a noxious and toxic gas. Newly acquired evidence indicates potential biomedical applications for H<sub>2</sub>S. H<sub>2</sub>S is now recognized - along with carbon monoxide (CO) and nitric oxide (NO) - as an endogenous gaseous mediator exerting important physiological actions [7]. The role of H<sub>2</sub>S in the developing lung is unknown. The discovery that H<sub>2</sub>S is an endogenously produced gaseous second messenger capable of modulating many physiological processes including vasodilation and cytoprotection [7], much like NO, prompted us to investigate the potential of H<sub>2</sub>S as a lung-protective agent. Thus, we

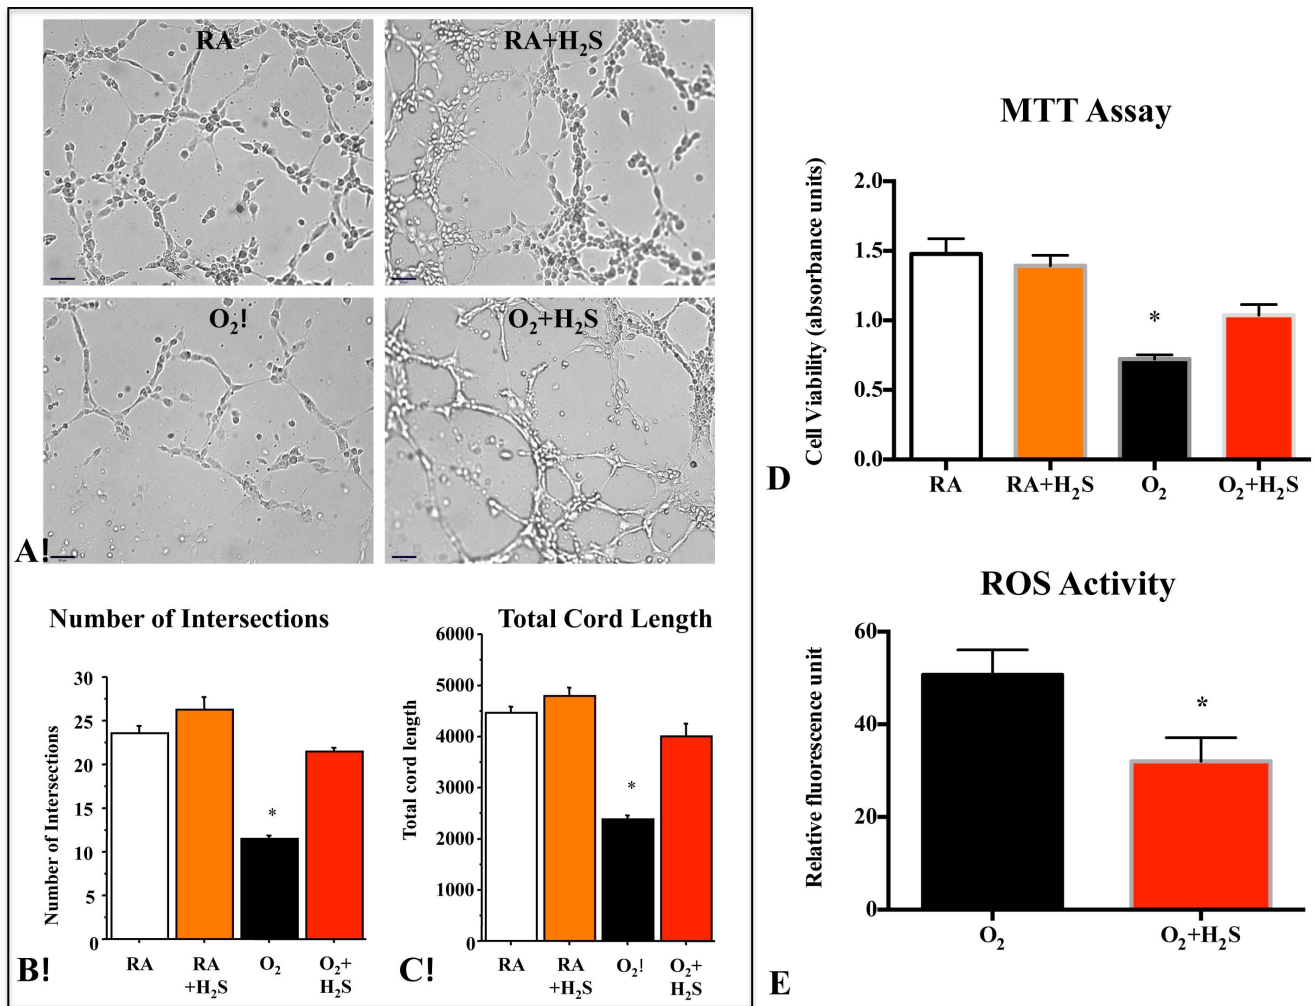

**Figure 1. H<sub>2</sub>S protected human pulmonary artery endothelial cells (HPAECs) from O<sub>2</sub>-induced toxicity.** (A) H<sub>2</sub>S promotes endothelial network formation. Quantitative assessment of cordlike structure formation shows a significant decrease in the number of intersects and the total length of cord-like structures in hyperoxia. H<sub>2</sub>S preserved the number of intersects (B) and total cord-structure length (C). (n=3 per group, \*P<0.0001 hyperoxia vs. other groups, scale bar 65 μm). (D) HPAECs were cultured for 48 hours in room air (Normoxia) or 95% hyperoxia. Mean data of cell viability as assessed by measuring the mitochondrial-dependent reduction of colorless 3-(4,5-dimethylthiazol-2-yl)-2,5-diphenyltetrazolium bromide (MTT) shows that hyperoxia significantly decreases HPAECs viability as compared with room air-exposed cells. H<sub>2</sub>S treatment significantly improved HPAECs viability in hyperoxia (n=7, \*P<0.001). (E) After 48 hours culture in hyperoxia (95%), ROS activity evaluated by measuring the dichlorofluorescein (DCF) shows that hyperoxia increases the ROS production in HPAECs, treatment with GYY4137 significantly decreased the ROS (n=6/group, \*P<0.005 Hyperoxia vs O<sub>2</sub>+H<sub>2</sub>S). doi:10.1371/journal.pone.0090965.g001

hypothesized that H<sub>2</sub>S would preserve alveolar development and prevents PHT in experimental oxygen-induced lung injury in newborn rats.

## Materials and Methods

All procedures were approved by the University of Alberta Animal Care and Use Committee.

### Human Pulmonary Artery Endothelial Cells (HPAECs) Network Formation Assay

The formation of cord-like structures by human pulmonary artery endothelial cells (HPAECs [ATCC, Manassas, VA]) was assessed in Matrigel-coated wells [8]. HPAECs (40,000 cells/well) were seeded into 48-well plates coated with Matrigel (BD Biosciences, Mississauga, ON) into groups of triplicates: (1) room

air, (2) room air+GYY4137 (100 microM) (3) hyperoxia (95% O<sub>2</sub>), (4) hyperoxia+GYY4137 (100 microM) and incubated at 37°C for 8 h. GYY4137 (morpholin-4-ium-4-methoxyphenyl (morpholino) phosphinodithioate) is a recently described slow-releasing H<sub>2</sub>S donor (Cayman chemical, Ann Arbor, Michigan). Cord-like structures were observed using an inverted phase contrast microscope (Leica, Richmond Hill, ON, Canada) and quantified by measuring the number of intersections and the length of structures in random fields from each well using OpenLab (Quorum Technologies Inc, ON, Canada).

### HPAECs Viability Assay

After 48 hrs of culture in room air (control), hyperoxia (95% O<sub>2</sub>) or hyperoxia+100 microM GYY4137, HPAECs viability was evaluated by measuring the mitochondrial-dependent reduction of colorless 3-(4,5-Dimethylthiazol-2-yl)- 2,5- diphenyltetrazolium

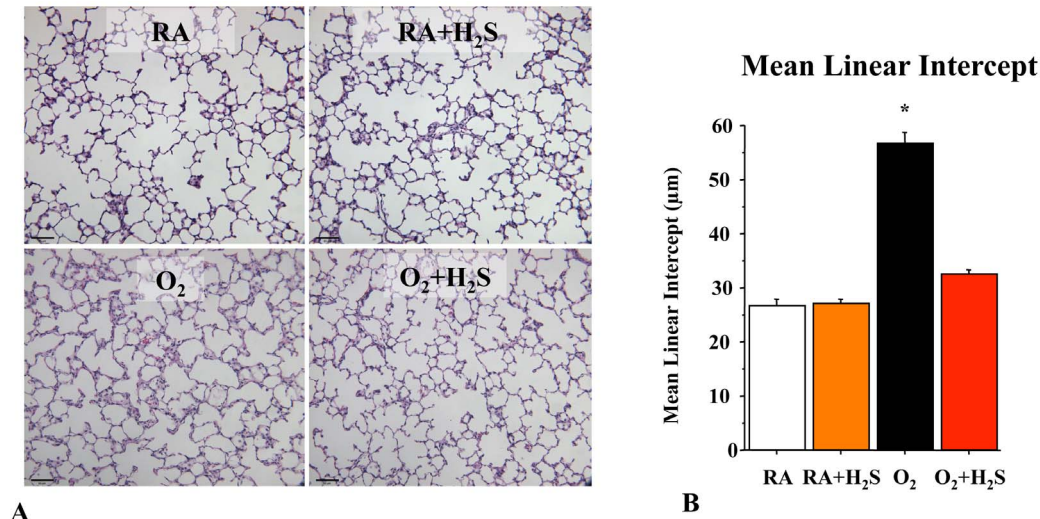

**Figure 2. *In vivo* H<sub>2</sub>S treatment prevents arrested alveolar growth in experimental O<sub>2</sub>-induced lung injury.** Representative (A) hematoxylin and eosin (H&E)-stained (scale bar 130 µm) lung sections at P21 showing larger and fewer alveoli in hyperoxia-exposed lungs as compared with lungs of room air housed rat pups. Treatment of hyperoxia-exposed animals with H<sub>2</sub>S preserved alveolar structure. (B) The mean linear intercept confirms arrested alveolar growth in untreated O<sub>2</sub>-exposed animals and preserved alveolar structure with H<sub>2</sub>S treatment (n = 5 per group, \*P < 0.0001 hyperoxia vs. other groups). doi:10.1371/journal.pone.0090965.g002

bromide (MTT) (Invitrogen, Eugene, Oregon, USA) to blue colored formazan which was dissolved in dimethyl sulfoxide and the absorbance of each sample was spectrophotometrically measured at 550 nm with a Spectra Max 190 (Molecular Devices) microplate reader [9].

#### Intracellular Reactive Oxygen Species (ROS) Measurement

After 48 hrs of culture in hyperoxia (95% O<sub>2</sub>) or hyperoxia+100 microM GYY4137, ROS activity was evaluated in HPAECs by the cell-permeable fluorogenic probe 2', 7'-Dichlorodihydrofluorescein diacetate (DCFH-DA) using ROS assay kit obtained from Cell Biolabs, Inc (STA-342, San Diego, CA). In brief, DCFH-DA is diffused into cells and is deacetylated by cellular esterases to non-fluorescent 2', 7'-Dichlorodihydrofluorescein (DCFH), which is rapidly oxidized to highly fluorescent 2', 7'-Dichlorodihydrofluorescein (DCF) by ROS. The fluorescence intensity is proportional to the ROS levels within the cell cytosol.

#### Pulmonary Artery Smooth Muscle Cells (PASMCs) Proliferation

PASMCs were freshly isolated from adult Sprague-Dawley rats following an established protocol [10] and maintained in DMEM supplemented with 10% FBS and 1% PSF (complete DMEM). For the MTT assay, cells were seeded into plastic 24-well cell culture plates at a density of 20,000 cells/well. When PASMCs were ~80% confluent, media was replaced with 500 µL complete DMEM containing 20 ng/mL of platelet-derived growth factor (PDGF) and/or 100 mM GYY4137. Media were changed daily. After 96 hours, media was aspirated and replaced with 500 µL of a 3-(4,5-Dimethylthiazol-2-yl)-2,5-diphenyltetrazolium bromide (MTT, 0.5 mg/mL). Cells were incubated for 2 hours at 37°C. MTT was removed and 10 µL of DMSO was placed on cells to dissolve the formazan crystals. A colorimetric plate reader was used to measure absorbance at 550 nm, which is directly correlated with the number of live cells in the sample [9].

#### Oxygen-induced Lung Injury

Rat pups were exposed to room air (21%, control group) or hyperoxia (95% O<sub>2</sub>, BPD group) from birth to P14 in sealed Plexiglas chambers (BioSpherix, Redfield, NY) with continuous O<sub>2</sub> monitoring [8]. Dams were switched every 48 hours between the normoxic and hyperoxic chambers to prevent damage to their lungs and provide equal nutrition to each litter. Litter size was adjusted to 12 pups to control for effects of litter size on nutrition and growth. Rat pups were sacrificed at P21 for prevention experiment and at P30 for rescue experiment with intraperitoneal pentobarbital, and lungs and heart were processed, according to the performed experiments.

#### Experimental Protocol

Newborn rat pups were randomized to four groups: (1) room air; (2) room air+GYY4137; (3) hyperoxia (95% O<sub>2</sub>, BPD group); and (4) hyperoxia+GYY4137. GYY4137 (37.75 mg/kg/day [11]; Cayman chemical, Ann Arbor, Michigan diluted in sterile distilled water) was administered daily via intraperitoneal injection from P4 to P14 in the prevention study and from P14 to P24 in the rescue study.

#### Lung Morphometry

Lungs were fixed with a 10% formaldehyde solution through the trachea at a constant pressure of 20 cm H<sub>2</sub>O. The trachea was then ligated and the lungs immersed in fixative overnight. Lungs were processed and embedded in paraffin. Serial step sections, 4 µm in thickness, were taken along the longitudinal axis of the lobe. The fixed distance between the sections was calculated so as to allow systematic sampling of 10 sections across the whole lobe. Lungs were stained with hematoxylin and eosin (H&E). Alveolar structures were quantified on a motorized microscope stage by using the mean linear intercept (MLI) as previously described [8,12,13].

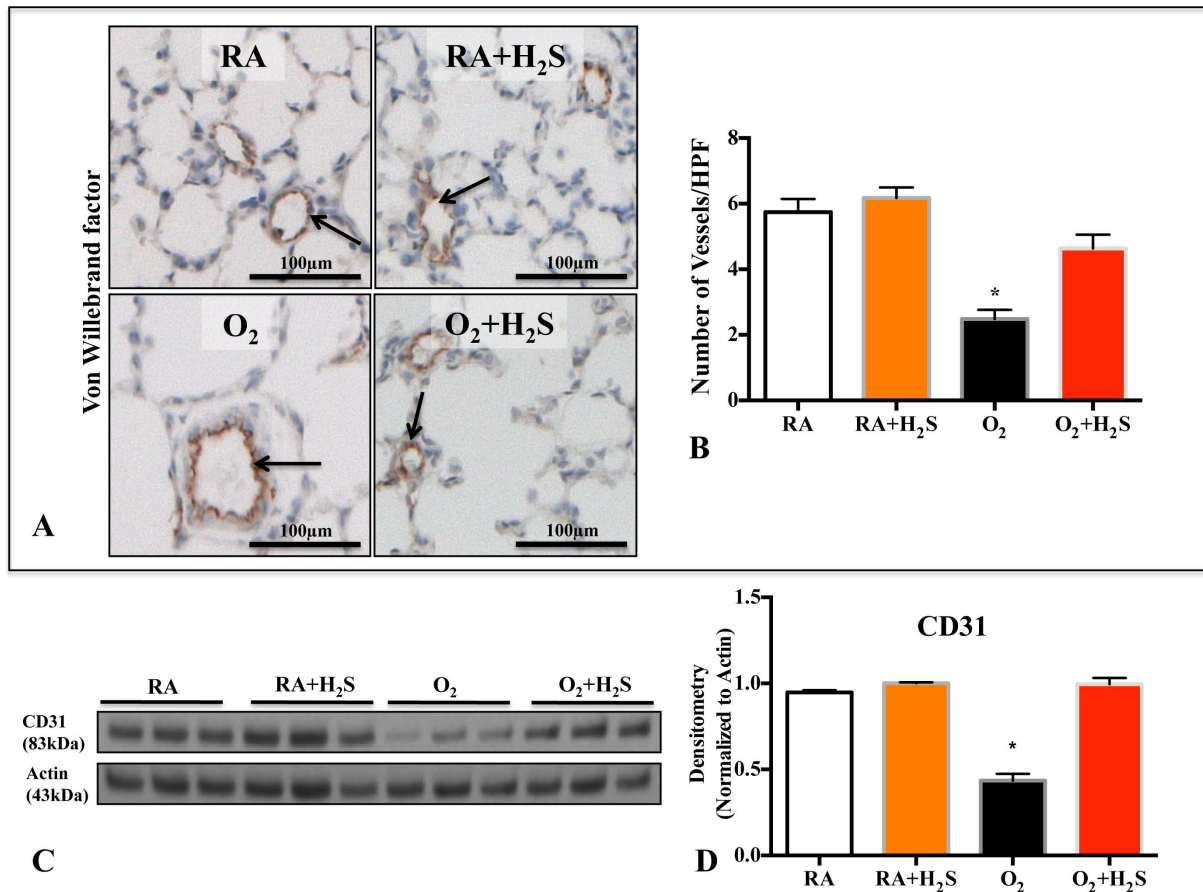

**Figure 3. *In vivo* H<sub>2</sub>S treatment prevents O<sub>2</sub>-induced arrested lung vascular growth.** A. Representative photomicrographs showing von Willebrand (vWF) factor staining (brown) in RA (room air), RA+H<sub>2</sub>S, hyperoxia (O<sub>2</sub>) and O<sub>2</sub>+H<sub>2</sub>S exposed lungs. Arrows highlight vWF-positive vessels; scale bars represent 100  $\mu$ m. B. Mean data quantifying the number of vWF positive vessels between groups. The decrease in the number of vessels per high-power field (HPF) after hyperoxia exposure was prevented by H<sub>2</sub>S treatment (n=5–7/group, \*P<0.005 Hyperoxia vs O<sub>2</sub>+H<sub>2</sub>S). C. Representative immunoblot and densitometric (D) analysis for endothelial marker CD31 in lung homogenates from control and H<sub>2</sub>S treated animals. H<sub>2</sub>S treatment preserved the expression of CD31 in hyperoxic rats compared with hyperoxic control (n=3/group, \*P<0.005 Hyperoxia vs O<sub>2</sub>+H<sub>2</sub>S). doi:10.1371/journal.pone.0090965.g003

### Echo-doppler

Pulmonary artery acceleration time, expressed as a ratio over the right ventricular ejection time (PAAT/RVET), was assessed by Doppler echocardiography as previously described [14].

### Right Ventricular Hypertrophy (RVH) and Pulmonary Artery Remodeling

Right ventricle and left ventricle plus septum were weighed separately to determine the right ventricle to left ventricle+septum ratio (RV/LV+S) as an index of RVH [12]. To assess pulmonary artery remodeling, the medial wall thickness (MWT) was calculated as (external diameter-lumen diameter)/vessel diameter using small vessels (30–100  $\mu$ m) [12].

### Immunoblotting

Protein expression in whole lungs was measured with immunoblotting as previously described [8] using commercially available antibodies. The intensity of the bands was normalized to the intensity of a reporter protein (actin) using the Kodak Gel-doc system. Akt and phospho-Akt antibodies were obtained from Cell Signaling (Cat # 9272 and 9271, Danvers, MA), SIRT1 antibody from Santa Cruz Biotechnology Inc (sc-15404, Santa Cruz, CA),

caspase 3 and CD31 from Abcam (ab13847 and ab24590, Cambridge, MA, USA).

### Immunohistochemistry

von Willebrand Factor (vWF) positive lung capillaries (30–100  $\mu$ m) were quantified on a Zeiss (Imager.M2) microscope [15].

### Mitochondrial Function

Imaging was performed with a Zeiss LSM 510 confocal microscope (Carl Zeiss). Mitochondrial membrane potential ( $\Delta\Psi$ m) was studied in live rat lung epithelial cells (RLE-6TN (ATCC® CRL-2300™ Manassas, VA, USA) as described [16] using tetramethylrhodamine methyl-ester perchlorate (TMRM) (10 nM/L,  $\times$ 30 minutes, 37°C) from Molecular Probes, Eugene, OR. Mitochondrial superoxide production was measured using MitoSOX™ (5  $\mu$ M, Molecular Probes, Eugene, OR). Fluorescein isothiocyanate (FITC) and tetramethylrhodamine isothiocyanate (TRITC)-conjugated (DAKO, Markham, Ontario) secondary antibodies were used in immunofluorescence. TMRM and MitoSOX™ intensity was measured in ten random fields per slide; a minimum of five slides per experiment was used.

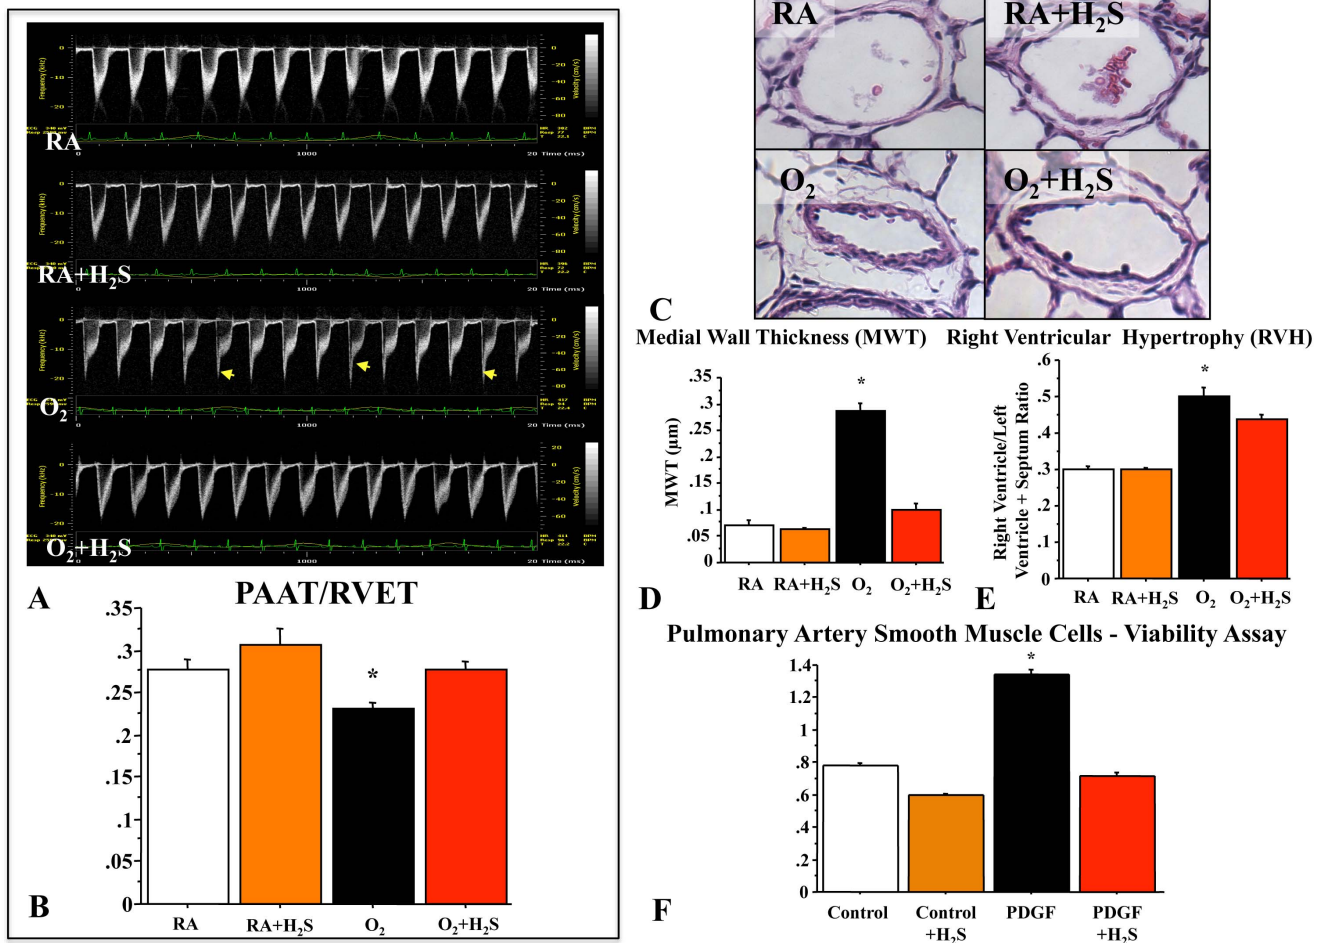

**Figure 4. H<sub>2</sub>S prevents pulmonary hypertension associated with O<sub>2</sub>-induced lung injury.** (A) Pulmonary arterial acceleration time/right ventricular ejection time (PAAT/RVET). Representative echo Doppler and mean PAAT/RVET showing a characteristic notch indicating PHT (**arrow**) in hyperoxic-exposed rat pups and a significantly decreased PAAT/RVET as compared with rat pups housed in room air. (B) H<sub>2</sub>S significantly increased PAAT/RVET as compared with untreated hyperoxic rat pups (n=6 animals per group, \*P<0.005 hyperoxia vs. other groups). (C) Pulmonary arterial medial wall thickness (MWT). Representative H&E stained sections of pulmonary arteries from the four experimental groups and % mean MWT. Hyperoxic-exposed rats had a significant increase in %MWT as compared with room air-housed rat pups. (D) H<sub>2</sub>S significantly reduced %MWT (n=5 animals per group, \*P<0.0001, hyperoxia vs. other groups, scale bar 65 μm). (E) Right ventricular hypertrophy (RVH). Hyperoxic-exposed rats had significant RVH as indicated by the increase in RV/LV+S ratio compared with room air control rats. H<sub>2</sub>S significantly reduced RVH (n=6 animals per group, \*P<0.005 hyperoxia vs. other groups). (F) Treatment with GYY4137 significantly attenuated PDGF-induced proliferation (n=6/group, \*p<0.001).

doi:10.1371/journal.pone.0090965.g004

## Statistical Analysis

Values are expressed as means (±SEM). Statistical comparisons were made with ANOVA. Post hoc analysis used a Fisher's probable least significant difference test (Statview 5.1; Abacus Concepts, Berkeley, CA). A value of P less than 0.05 was considered statistically significant. All counting assessments were performed by investigators blinded to the experimental groups.

## Results

### H<sub>2</sub>S Preserves HPAECs Network Formation, Viability and Decreases ROS Generation in Hyperoxia

*In vitro*, HPAECs were exposed to room air or 95% O<sub>2</sub> in serum-free Matrigel and assessed for the formation of cord-like networks (Figure 1A). Hyperoxia significantly decreased endothelial cord-like structure formation as assessed by the number of intersections (Figure 1B) and average tube length (Figure 1C).

GY4137 significantly counteracted the effect of O<sub>2</sub> and promoted endothelial network formation (Figures 1B and C).

Viability of HPAECs was significantly decreased in hyperoxia significantly decreased compared to room air cultured HPAECs (Figure 1D). GYY4137 significantly improved HPAEC survival by ~43% (P<0.001) in hyperoxia (Figure 1D).

As shown by dichlorofluorescein oxidation assay (Figure 1E), GYY4137 treatment of HPAECs prevented cellular ROS production in hyperoxia compared with untreated hyperoxic control.

These *in vitro* assays formed the rationale to further investigate the therapeutic potential of the H<sub>2</sub>S donor GYY4137 in an experimental model of hyperoxia-induced neonatal rat lung injury mimicking BPD.

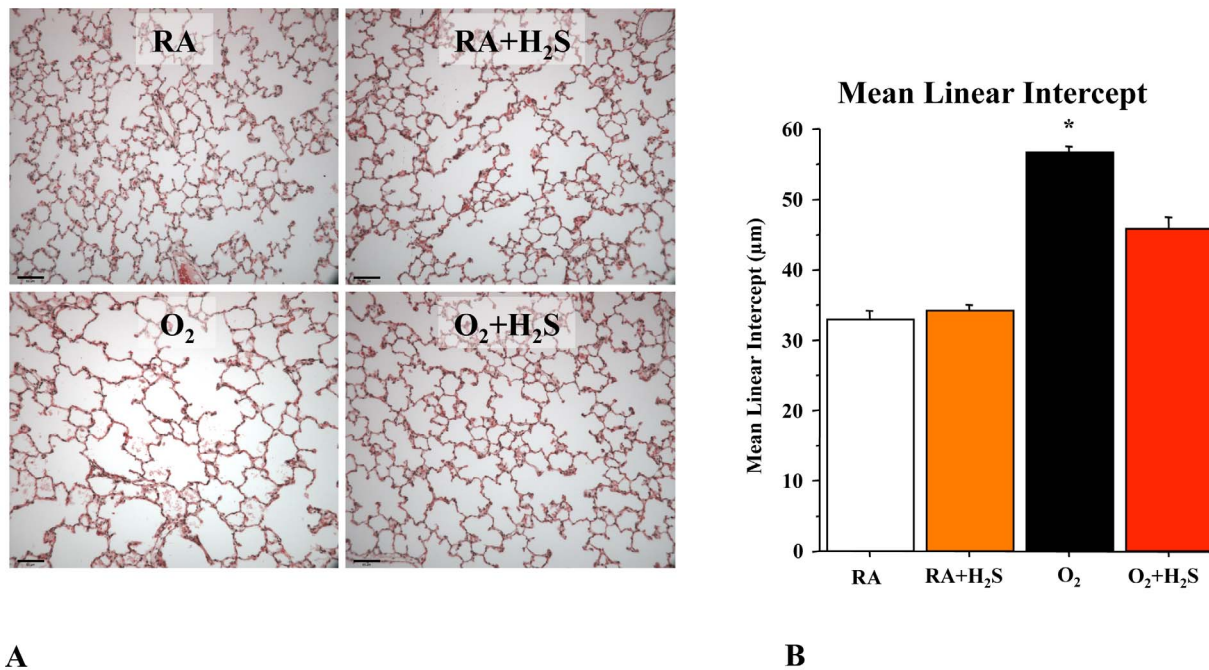

**Figure 5. H<sub>2</sub>S rescues alveolarization after established O<sub>2</sub>-induced lung injury.** (A) Representative H&E-stained lung sections of animals treated with GYY4137 from day P14–P24, after established lung injury, and harvested at P30. H<sub>2</sub>S in O<sub>2</sub>-exposed animals restored alveolar growth. (B) This is confirmed by the mean linear intercept (n = 5, \*P < 0.0001 hyperoxia vs. other groups, scale bar 65 μm). doi:10.1371/journal.pone.0090965.g005

#### GYY4137 Treatment Preserves Alveolar Growth in O<sub>2</sub>-induced Lung Injury in Neonatal Rats

To test the therapeutic potential of GYY4137 *in vivo*, neonatal rats exposed for 14 days to hyperoxia were treated with daily intraperitoneal injections of GYY4137 from day P4 to P14. Hyperoxia induced a histological pattern reminiscent of human BPD, characterized by airspace enlargement with simplified and fewer alveolar structures as shown by representative hematoxylin and eosin (H&E) stained sections (Figure 2A). Treatment with GYY4137 from P4–P14 preserved alveolar formation as quantified by the mean linear intercept (Figure 2B). GYY4137 treatment had no adverse effects on lung architecture in control animals.

#### GYY4137 Treatment Preserves Lung Vascular Growth in O<sub>2</sub>-induced Lung Injury

Hyperoxia also lead to an arrest in lung vascular growth as demonstrated by decreased vWF positive lung vessels (Figure 3A, B) and CD31 lung protein expression (Figure 3C, D). H<sub>2</sub>S treatment attenuated the loss of vWF positive cells (Figure 3A, B) and CD31 expression (Figure 3C–D).

#### GYY4137 Reduces PHT Associated with O<sub>2</sub>-induced Lung Injury

PHT is a significant complication in severe BPD. Neonatal rats exposed to chronic hyperoxia developed PHT as demonstrated by a significant decrease in the PAAT/RVET on echodoppler (Figure 4A, B) and an increase in MWT of small pulmonary arteries (Figure 4C, D) and RVH (Figure 4E). H<sub>2</sub>S attenuated these functional and structural features of PHT as indicated by an increase in mean PAAT/RVET (Figure 4B), a decrease in MWT (Figure 4D), and a reduction in RVH (Figure 4E). *In vitro*, treatment with GYY4137 significantly attenuated PDGF-induced PASMC proliferation (Figure 4F).

#### GYY4137 Treatment Rescues the Loss of Alveoli after Established O<sub>2</sub>-induced Hypoalveolarization

We also tested the ability of GYY4137 to restore lung hypoalveolarization after established lung damage (Figure 5A). In this rescue experiment, untreated hyperoxia-exposed rats exhibited persistent impairment in alveolar growth (Figure 5A). GYY4137 administration from P14 (end of O<sub>2</sub> exposure) to P24 significantly improved the lung architecture compared with O<sub>2</sub>-exposed animals (Figure 5B).

#### GYY4137 Treatment Activates the PI3K Pathway and Decreases Apoptosis in O<sub>2</sub>-induced Lung Injury

Hyperoxia significantly decreased whole lung P-Akt and Sirtuin1 expression (Figure 6A) and increased total caspase-3 (Figure 6C) expression compared with room air control lungs, suggesting decreased survival and enhanced apoptosis of lung cells. Conversely, treatment with GYY4137 preserved lung P-Akt and Sirtuin1 expression in hyperoxia (Figure 6B) and significantly attenuated apoptosis (Figure 6D).

#### GYY4137 Preserves Mitochondrial Potential ( $\Delta\Psi_m$ ) and Attenuates the Production of Mitochondrial Reactive Oxygen Species (mROS)

To further investigate the mechanism of GYY4137-induced lung cell survival, we assessed mitochondrial function in lung epithelial cells. Mitochondria are potential targets by oxygen radicals, and an alteration in mitochondrial membrane function is an important component of oxidative stress in cells. Because the mitochondrial membrane potential ( $\Delta\Psi_m$ ) *in situ* is a measure of the energetic state of the cell as well as a sensitive indicator of mitochondrial function, we assessed the electrical potential across the inner mitochondrial membrane of room air and O<sub>2</sub>-exposed RLEs. RLEs exposed to hyperoxia had hypo-polarized mitochon-

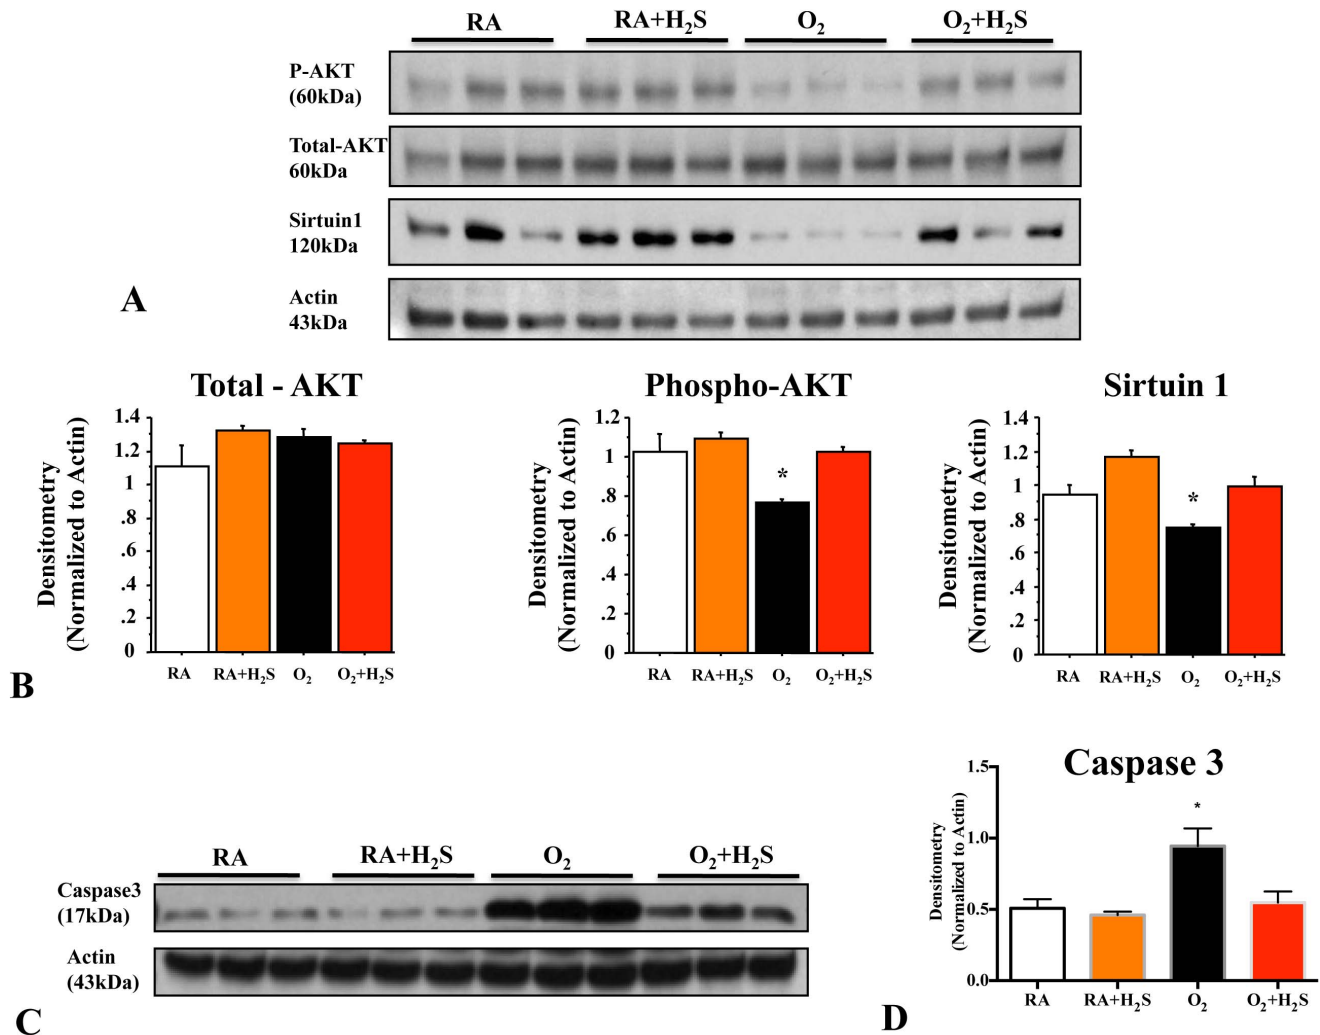

**Figure 6. GYY4137 treatment activates the PI3K pathway and decreases apoptosis in O<sub>2</sub>-induced lung injury.** (A) Immunoblots show decreased P-Akt and Sirtuin1 expression in hyperoxic-exposed lungs. (B) Treatment with H<sub>2</sub>S increased expression of P-Akt and Sirtuin1 expression in hyperoxic lungs (n=3/group, \*P<0.005). (C) *In vivo* H<sub>2</sub>S decreases apoptosis in oxygen-exposed lungs with BPD. Immunoblots of total caspase-3 and actin are shown for the four experimental groups. (D) Hyperoxia-exposed lungs showed increased total caspase-3 expression, which was attenuated by *in vivo* H<sub>2</sub>S treatment (n=3/group, \*P<0.005). doi:10.1371/journal.pone.0090965.g006

dria (decrease in  $\Delta\Psi_m$ ) (Figure 7A, B) as assessed by tetramethylrhodamine methyl ester (TMRM) and increased mROS production (Figure 7C, D) as assessed by MitoSOX compared to room air controls. In contrast, treatment with GYY4137 attenuated the decrease in  $\Delta\Psi_m$  (Figure 7B) and dampened mROS production (Figure 7D).

## Discussion

Our findings demonstrate the protective effect of H<sub>2</sub>S on chronic hyperoxia-induced injury in the developing lung: *In vitro*, treatment with H<sub>2</sub>S protects HPAECs from O<sub>2</sub> toxicity and promotes HPAECs network formation. *In vivo*, H<sub>2</sub>S administration preserves and restores alveolar growth and alleviates echographic and structural signs of PHT.

Similar to NO and CO, H<sub>2</sub>S is a small gaseous molecule generated in mammalian cells by enzymatic catalysis which diffuses freely across the membrane lipid bilayer [7]. In mammalian cells, H<sub>2</sub>S is produced from L-cysteine, catalyzed by one of two pyridoxal-5'-phosphate-dependent enzymes, cystathi-

onine  $\beta$ -synthase (CBS) and/or cystathionine  $\gamma$ -lyase (CTH). H<sub>2</sub>S is considered a toxic gas. Its smell of rotten eggs can be perceived at concentrations as low as 0.0047 ppm. In serious cases, it causes cough, headache, pulmonary edema, or even coma. However, recent reports show that H<sub>2</sub>S is endogenously generated in the mammalian body and plays important physiological roles. Growing evidence implicates H<sub>2</sub>S in the pathogenesis of pulmonary diseases [17].

In the present study we show, both *in vitro* and *in vivo*, that H<sub>2</sub>S treatment displays lung-protective properties in the developing lung. Because angiogenesis contributes to alveolar growth [8], we examined the protective effect of H<sub>2</sub>S on HPAECs. *In vitro*, H<sub>2</sub>S preserved HPAECs viability and maintained HPAECs network formation in hyperoxia. Furthermore, H<sub>2</sub>S reduced HPAEC ROS levels in hyperoxia. This is consistent with reports showing that H<sub>2</sub>S protects cells and proteins from oxidative stress induced by peroxynitrite and hypochlorous acid [18]. In endothelial cells, hydrogen peroxide and organic hydroperoxides such as lipid hydroperoxides (LOOHs) are responsible for the activation of

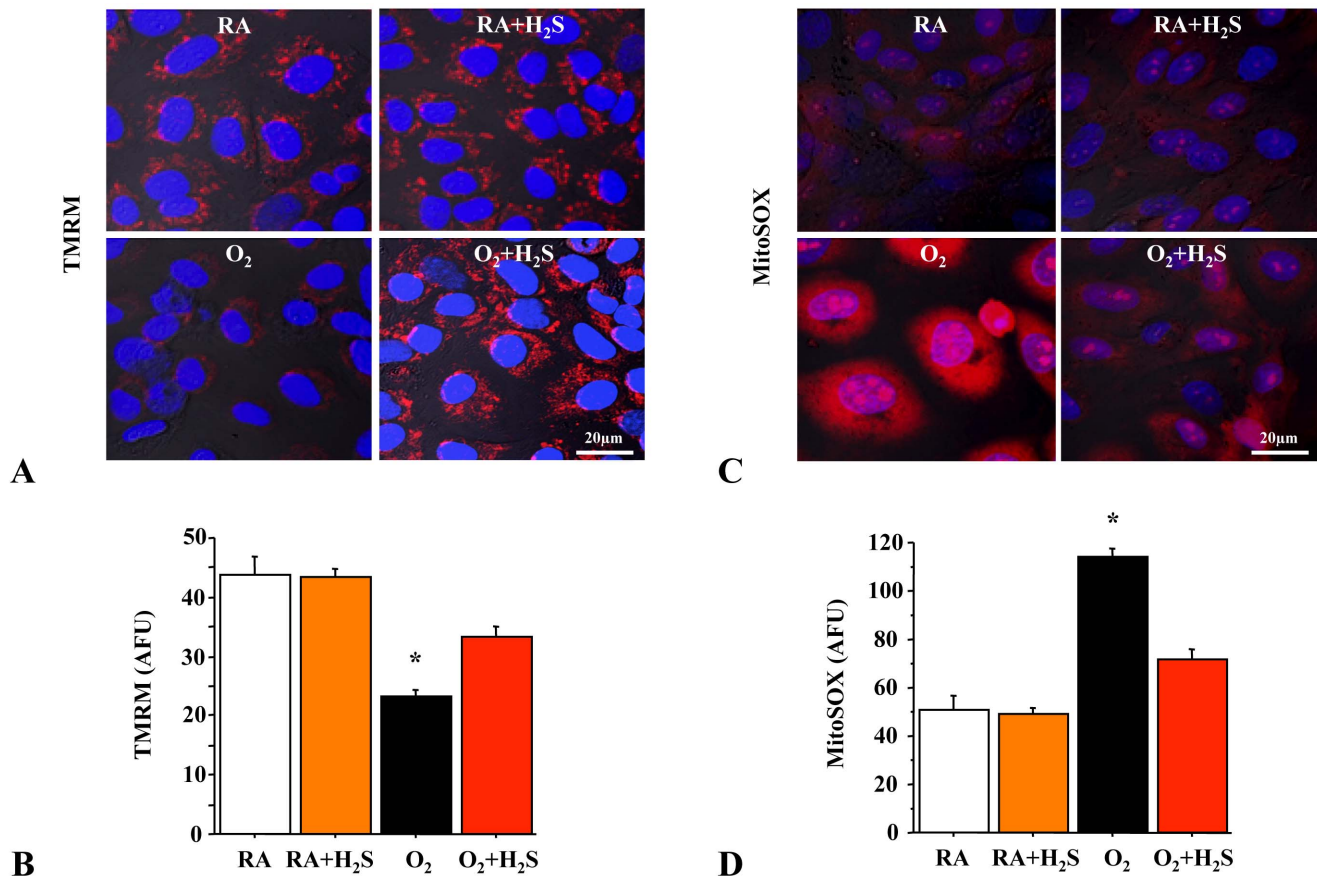

**Figure 7. Rat lung epithelial cells (RLEs) exposed to hyperoxia decreased mitochondrial  $\Delta\Psi_m$  and increased mROS.** Representative confocal microscopy at high magnification ( $\times 100$ ) of rat lung epithelial cells (RLEs) showing (A) decreased  $\Delta\Psi_m$  (TMRM) and (C) increased mROS production (MitoSOX) in hyperoxia (TMRM and MitoSOX are in red, merged with nuclear stain DAPI in blue). Hyperoxia exposed RLEs treated with H<sub>2</sub>S have significantly increased  $\Delta\Psi_m$  (B) and decreased mROS (D) compared to hyperoxic control ( $n=4$  per group,  $*P<0.005$  hyperoxia vs. other groups).

doi:10.1371/journal.pone.0090965.g007

heme oxygenase-1 (HO-1), one of the ROS responders that trigger extensive oxidative damage in endothelial cells. H<sub>2</sub>S is capable of destroying hydrogen peroxide and LOOHs [19]. Consistent with these *in vitro* data, we show through vWF staining and CD31 lung protein expression that H<sub>2</sub>S preserved lung vascular growth in rats pups exposed to chronic hyperoxia.

Inhaled NO is a potent pulmonary vasodilator and promotes distal lung growth. Inhaled NO shows promise as a prophylactic therapy to decrease the incidence of BPD in experimental models [20–22], while results in preterm infants remain inconclusive [23]. Thus, we hypothesized that H<sub>2</sub>S would have similar beneficial effects on distal lung growth and PHT. *In vivo*, H<sub>2</sub>S indeed attenuated the arrested alveolar growth in the chronic oxygen induced arrested alveolar growth in rat model. While we demonstrate for the first time the protective effect of H<sub>2</sub>S on the developing lung, recent reports indicated a therapeutic potential of H<sub>2</sub>S in various acute adult lung injury models. Inhalation of 80 ppm H<sub>2</sub>S ameliorates lung pathology in LPS [24] and in ventilator [25] induced lung injury. Interestingly, Francis et al observed that 1 or 5 ppm H<sub>2</sub>S did not alter ventilation-induced lung injury, while 60 ppm H<sub>2</sub>S worsened ventilator-induced lung injury [26]. In contrast, intravenous pretreatment with sodium sulfide (Na<sub>2</sub>S) attenuated reduced pulmonary edema, enhanced the pulmonary expression of Nrf2-dependent antioxidant genes and prevented oxidative stress-induced depletion of glutathione in

lung tissue [26]. This is consistent with the protective effect observed in the neonatal chronic hyperoxia-induced lung injury model, in which Nrf2 preserves alveolar growth while Nrf2 deficiency worsens lung injury [27], [28].

PHT often complicates chronic lung diseases including BPD and significantly worsens the prognosis [5,6]. H<sub>2</sub>S induces vasodilatation and inhibits vascular smooth muscle cell proliferation [7]. In our study, hyperoxia-exposed rats exhibited marked PHT as assessed by echo Doppler (decreased PAAT/RVET), RVH, and remodeling of the pulmonary MWT. H<sub>2</sub>S alleviated these features of PHT, warranting further investigation of H<sub>2</sub>S as a potential treatment for PHT. The mechanisms by which H<sub>2</sub>S attenuates PHT, aside from increasing lung angiogenesis, remain unclear. To our knowledge, there are no data available on H<sub>2</sub>S interactions with the signaling pathways contributing to PHT in the hyperoxia model [29]. Interestingly, H<sub>2</sub>S protects against balloon injury induced neointima hyperplasia of the carotid artery and decreases vascular smooth muscle cell proliferation in this model [30]. Likewise, we found that GYY4137 attenuated PDGF-induced PASMC proliferation.

Interestingly, we showed that the expression of activated Akt *in vivo* decreased in the lungs of animals exposed to hyperoxia, while the expression of total caspase-3, a marker of apoptosis, significantly increased. Both these changes in P-Akt and total caspase-3 expression were significantly attenuated by H<sub>2</sub>S



treatment. This observation indicates a potential role of the pro-survival PI3K/Akt pathway in determining the ability of AECs to resist to hyperoxic injury. H<sub>2</sub>S attenuates particulate matter-induced human lung endothelial barrier disruption via combined ROS scavenging and Akt activation [31]. Moreover, we have shown recently that activation of Akt protects alveoli from experimental oxygen-induced lung injury in newborn rats [9]. Accordingly, previous studies report that the H<sub>2</sub>S donor sodium hydrosulfide (NaSH) induces a dose and time-dependent increase in Akt phosphorylation in endothelial cells [32], which can be inhibited by the PI3K inhibitors LY 294002 and wortmannin. This suggests that H<sub>2</sub>S stimulates the activation of pro-survival Akt. Activation of Akt by various extracellular signals increases endothelial cell proliferation, migration, and tube formation *in vitro* [33], and mediates protective cytoskeletal rearrangement [34]. However, the mechanism by which H<sub>2</sub>S activates Akt is poorly understood and remains to be investigated.

We also found that sirtuin1 gene expression was higher in H<sub>2</sub>S-treated groups compared to untreated hyperoxia-exposed animals. Sirtuins (silencing information regulator) are nuclear nicotinamide adenine dinucleotide-dependent histone deacetylases. In mammalian cells, sirtuin1 appears to control the cellular response to stress by regulating the FOXO family of forkhead transcription factors. Because FOXO transcription factors transactivate a series of target genes that have critical roles in the cellular response to stress stimuli, endogenous sirtuin1 may potentiate FOXO's ability to detoxify ROS and to repair damaged DNA [35]. It has been reported that sirtuin1 levels were reduced in macrophages and lungs of smokers and patients with chronic obstructive pulmonary disease due to its post-translational modifications by cigarette smoke-derived reactive components [36].

## References

- Iams JD, Romero R, Culhane JF, Goldenberg RL (2008) Primary, secondary, and tertiary interventions to reduce the morbidity and mortality of preterm birth. *Lancet* 371: 164–175.
- Shah PS, Sankaran K, Aziz K, Allen AC, Seshia M, et al. (2012) Outcomes of preterm infants <29 weeks gestation over 10-year period in Canada: a cause for concern? *J Perinatol* 32: 132–138.
- Kinsella JP, Greenough A, Abman SH (2006) Bronchopulmonary dysplasia. *Lancet* 367: 1421–1431.
- Kotecha SJ, Edwards MO, Watkins WJ, Henderson AJ, Paranjothy S, et al. (2013) Effect of preterm birth on later FEV1: a systematic review and meta-analysis. *Thorax* 68: 760–766.
- Berkelhamer SK, Mestan KK, Steinhorn RH (2013) Pulmonary hypertension in bronchopulmonary dysplasia. *Semin Perinatol* 37: 124–131.
- Mourani PM, Abman SH (2013) Pulmonary vascular disease in bronchopulmonary dysplasia: pulmonary hypertension and beyond. *Curr Opin Pediatr* 25: 329–337.
- Szabo C (2007) Hydrogen sulphide and its therapeutic potential. *Nat Rev Drug Discov* 6: 917–935.
- Thebaud B, Ladha F, Michelakis ED, Sawicka M, Thurston G, et al. (2005) Vascular endothelial growth factor gene therapy increases survival, promotes lung angiogenesis, and prevents alveolar damage in hyperoxia-induced lung injury: evidence that angiogenesis participates in alveolarization. *Circulation* 112: 2477–2486.
- Alphonse RS, Vadivel A, Coltan L, Eaton F, Barr AJ, et al. (2011) Activation of Akt protects alveoli from neonatal oxygen-induced lung injury. *Am J Respir Cell Mol Biol* 44: 146–154.
- Archer SL, Wu XC, Thebaud B, Nsair A, Bonnet S, et al. (2004) Preferential expression and function of voltage-gated, O<sub>2</sub>-sensitive K<sup>+</sup> channels in resistance pulmonary arteries explains regional heterogeneity in hypoxic pulmonary vasoconstriction: ionic diversity in smooth muscle cells. *Circ Res* 95: 308–318.
- Li L, Whiteman M, Guan YY, Neo KL, Cheng Y, et al. (2008) Characterization of a novel, water-soluble hydrogen sulfide-releasing molecule (GYY4137): new insights into the biology of hydrogen sulfide. *Circulation* 117: 2351–2360.
- Ladha F, Bonnet S, Eaton F, Hashimoto K, Korbutt G, et al. (2005) Sildenafil improves alveolar growth and pulmonary hypertension in hyperoxia-induced lung injury. *Am J Respir Crit Care Med* 172: 750–756.
- Pierro M, Ionescu L, Montemurro T, Vadivel A, Weissmann G, et al. (2013) Short-term, long-term and paracrine effect of human umbilical cord-derived stem cells in lung injury prevention and repair in experimental bronchopulmonary dysplasia. *Thorax* 68: 475–484.
- van Haaften T, Byrne R, Bonnet S, Rochefort GY, Akabutu J, et al. (2009) Airway delivery of mesenchymal stem cells prevents arrested alveolar growth in neonatal lung injury in rats. *Am J Respir Crit Care Med* 180: 1131–1142.
- Vadivel A, Alphonse RS, Collins JJ, van Haaften T, O'Reilly M, et al. (2013) The axonal guidance cue semaphorin 3C contributes to alveolar growth and repair. *PLoS One* 8: e67225.
- Sutendra G, Bonnet S, Rochefort G, Haromy A, Folmes KD, et al. (2010) Fatty acid oxidation and malonyl-CoA decarboxylase in the vascular remodeling of pulmonary hypertension. *Sci Transl Med* 2: 44ra58.
- Chen Y, Wang R (2012) The message in the air: hydrogen sulfide metabolism in chronic respiratory diseases. *Respir Physiol Neurobiol* 184: 130–138.
- Tang XQ, Yang CT, Chen J, Yin WL, Tian SW, et al. (2008) Effect of hydrogen sulphide on beta-amyloid-induced damage in PC12 cells. *Clin Exp Pharmacol Physiol* 35: 180–186.
- Muellner MK, Schreier SM, Laggner H, Hermann M, Esterbauer H, et al. (2009) Hydrogen sulfide destroys lipid hydroperoxides in oxidized LDL. *Biochem J* 420: 277–281.
- Balasubramaniam V, Maxey AM, Morgan DB, Markham NE, Abman SH (2006) Inhaled NO restores lung structure in eNOS-deficient mice recovering from neonatal hypoxia. *Am J Physiol Lung Cell Mol Physiol* 291: L119–L127.
- Bland RD, Albertine KH, Carlton DP, MacRitchie AJ (2005) Inhaled nitric oxide effects on lung structure and function in chronically ventilated preterm lambs. *Am J Respir Crit Care Med* 172: 899–906.
- McCurnin DC, Pierce RA, Chang LY, Gibson LL, Osborne-Lawrence S, et al. (2005) Inhaled NO improves early pulmonary function and modifies lung growth and elastin deposition in a baboon model of neonatal chronic lung disease. *Am J Physiol Lung Cell Mol Physiol* 288: L450–L459.
- Soll RF (2012) Inhaled nitric oxide for respiratory failure in preterm infants. *Neonatology* 102: 251–253.
- Faller S, Zimmermann KK, Strosing KM, Engelstaedt H, Buerkle H, et al. (2012) Inhaled hydrogen sulfide protects against lipopolysaccharide-induced acute lung injury in mice. *Med Gas Res* 2: 26.
- Faller S, Ryter SW, Choi AM, Loop T, Schmidt R, et al. (2010) Inhaled hydrogen sulfide protects against ventilator-induced lung injury. *Anesthesiology* 113: 104–115.
- Francis RC, Vaporidi K, Bloch KD, Ichinose F, Zapol WM (2011) Protective and Detrimental Effects of Sodium Sulfide and Hydrogen Sulfide in Murine Ventilator-induced Lung Injury. *Anesthesiology* 115: 1012–1021.

27. McGrath-Morrow S, Lauer T, Yee M, Neptune E, Podowski M, et al. (2009) Nrf2 increases survival and attenuates alveolar growth inhibition in neonatal mice exposed to hyperoxia. *Am J Physiol Lung Cell Mol Physiol* 296: L565–573.
28. Cho HY, van Houten B, Wang X, Miller-DeGraff L, Fostel J, et al. (2012) Targeted deletion of nrf2 impairs lung development and oxidant injury in neonatal mice. *Antioxid Redox Signal* 17: 1066–1082.
29. Jankov RP, Kantores C, Belcastro R, Yi M, Tanswell AK (2006) Endothelin-1 inhibits apoptosis of pulmonary arterial smooth muscle in the neonatal rat. *Pediatr Res* 60: 245–251.
30. Meng QH, Yang G, Yang W, Jiang B, Wu L, et al. (2007) Protective effect of hydrogen sulfide on balloon injury-induced neointima hyperplasia in rat carotid arteries. *Am J Pathol* 170: 1406–1414.
31. Wang T, Wang L, Zaidi SR, Sammani S, Siegler J, et al. (2012) Hydrogen Sulfide Attenuates Particulate Matter-Induced Human Lung Endothelial Barrier Disruption via Combined Reactive Oxygen Species Scavenging and Akt Activation. *Am J Respir Cell Mol Biol* 47: 491–496.
32. Cai WJ, Wang MJ, Moore PK, Jin HM, Yao T, et al. (2007) The novel proangiogenic effect of hydrogen sulfide is dependent on Akt phosphorylation. *Cardiovasc Res* 76: 29–40.
33. Zheng ZZ, Liu ZX (2007) Activation of the phosphatidylinositol 3-kinase/protein kinase Akt pathway mediates CD151-induced endothelial cell proliferation and cell migration. *Int J Biochem Cell Biol* 39: 340–348.
34. Singleton PA, Chatchavalvanich S, Fu P, Xing J, Birukova AA, et al. (2009) Akt-mediated transactivation of the S1P1 receptor in caveolin-enriched microdomains regulates endothelial barrier enhancement by oxidized phospholipids. *Circ Res* 104: 978–986.
35. Michan S, Sinclair D (2007) Sirtuins in mammals: insights into their biological function. *Biochem J* 404: 1–13.
36. Rajendrasozhan S, Yang SR, Kinnula VL, Rahman I (2008) SIRT1, an antiinflammatory and antiaging protein, is decreased in lungs of patients with chronic obstructive pulmonary disease. *Am J Respir Crit Care Med* 177: 861–870.
37. Freeman BA, Crapo JD (1981) Hyperoxia increases oxygen radical production in rat lungs and lung mitochondria. *J Biol Chem* 256: 10986–10992.
38. Esteve JM, Mompo J, Garcia de la Asuncion J, Sastre J, Asensi M, et al. (1999) Oxidative damage to mitochondrial DNA and glutathione oxidation in apoptosis: studies in vivo and in vitro. *FASEB J* 13: 1055–1064.
